# Supplementary material
Source: PubMed Central journal article supplement (PMC2857040)
Supplement: supp_M110.104083_jbc.M110.104083-1.pdf [file supp_M110.104083_jbc.M110.104083-1.pdf]

TABLE S1. *S. cerevisiae* strains used in this study.

| Strain            | Relevant genotype                                                                                                                          | Source     |
|-------------------|--------------------------------------------------------------------------------------------------------------------------------------------|------------|
| YLL 1772/1D       | <i>sae2Δ::NATMX4::SAE2::LEU2/sae2Δ::NATMX4::SAE2::LEU2</i><br><i>MEK1-HA3::URA3/MEK1-HA3::URA3</i>                                         | This study |
| YLL 1602/2C       | <i>sae2Δ::NATMX4/sae2Δ::NATMX4 MEK1-HA3::URA3/MEK1-HA3::URA3</i>                                                                           | This study |
| YLL 2341/17D      | <i>sae2Δ::NATMX4::sae2-S267A::LEU2/sae2Δ::NATMX4::sae2-S267A::LEU2</i><br><i>MEK1-HA3::URA3/MEK1-HA3::URA3</i>                             | This study |
| YLL 2340/6C       | <i>sae2Δ::NATMX4::sae2-S267D::LEU2/sae2Δ::NATMX4::sae2-S267D::LEU2</i><br><i>MEK1-HA3::URA3/MEK1-HA3::URA3</i>                             | This study |
| YLL 1600/1A       | <i>dmc1Δ::KANMX4/dmc1Δ::KANMX4</i><br><i>MEK1-HA3::URA3/MEK1-HA3::URA3</i>                                                                 | This study |
| YLL 1990.45/7B    | <i>sae2Δ::NATMX4/sae2Δ::NATMX4 dmc1Δ::KANMX4/dmc1Δ::KANMX4</i><br><i>MEK1-HA3::URA3/MEK1-HA3::URA3</i>                                     | This study |
| YLL 2438.91/20A   | <i>sae2Δ::NATMX4::sae2-S267A::LEU2/sae2Δ::NATMX4::sae2-S267A::LEU2</i><br><i>dmc1Δ::KANMX4/dmc1Δ::KANMX4 MEK1-HA3::URA3/MEK1-HA3::URA3</i> | This study |
| YLL 2720.10/5B    | <i>sae2Δ::NATMX4::sae2-S267D::LEU2/sae2Δ::NATMX4::sae2-S267D::LEU2</i><br><i>dmc1Δ::KANMX4/dmc1Δ::KANMX4 MEK1-HA3::URA3/MEK1-HA3::URA3</i> | This study |
| YLL 1772.5/3C-16  | <i>sae2Δ::NATMX4::SAE2::LEU2/sae2Δ::NATMX4::SAE2::LEU2 SPO11-MYC18::URA3/SPO11</i>                                                         | This study |
| YLL 2679.27/9C-18 | <i>sae2Δ::NATMX4/sae2Δ::NATMX4 SPO11-MYC18::URA3/SPO11</i>                                                                                 | This study |
| YLL 2341/16A-28   | <i>sae2Δ::NATMX4::sae2-S267A::LEU2/sae2Δ::NATMX4::sae2-S267A::LEU2</i><br><i>SPO11-MYC18::URA3/SPO11</i>                                   | This study |
| YLL 2340/5D-10    | <i>sae2Δ::NATMX4::sae2-S267D::LEU2/sae2Δ::NATMX4::sae2-S267D::LEU2</i><br><i>SPO11-MYC18::URA3/SPO11</i>                                   | This study |
| YLL 2516.60/1D-8  | <i>exo1Δ::HPH/exo1Δ::HPH pCLB2-SGS1::KANMX6/pCLB2-SGS1::KANMX6</i><br><i>SPO11-MYC18::URA3/SPO11</i>                                       | This study |
| YLL 2484.22/12D   | <i>dmc1Δ::KANMX4/dmc1Δ::KANMX4</i>                                                                                                         | This study |
| YLL 2485.62/5D    | <i>dmc1Δ::KANMX4/dmc1Δ::KANMX4 exo1Δ::HPH/exo1Δ::HPH</i>                                                                                   | This study |
| YLL 2528.21/1D    | <i>dmc1Δ::NATMX4/dmc1Δ::NATMX4 exo1Δ::HPH/exo1Δ::HPH</i><br><i>pCLB2-SGS1::KANMX6/pCLB2-SGS1::KANMX6</i>                                   | This study |
| YLL 2528.21/6D    | <i>dmc1Δ::NATMX4/dmc1Δ::NATMX4 pCLB2-SGS1::KANMX6/pCLB2-SGS1::KANMX6</i>                                                                   | This study |
| YLL 2656.2/15C    | <i>dmc1Δ::NATMX4/dmc1Δ::NATMX4 pif1-M2::URA3/pif1-M2::URA3</i>                                                                             | This study |
| YLL 2656.2/13D    | <i>dmc1Δ::NATMX4/dmc1Δ::NATMX4 pif1-M2::URA3/pif1-M2::URA3</i><br><i>dna2Δ::HPH/dna2Δ::HPH</i>                                             | This study |

|                 |                                                                                    |            |
|-----------------|------------------------------------------------------------------------------------|------------|
| YLL 1772/7D     | <i>SAE2-HA3::URA3/SAE2</i>                                                         | This study |
| YLL 2400        | <i>sae2Δ::NATMX4::sae2-S267A-HA3::URA3::LEU2/sae2Δ::NATMX4::sae2-S267A::LEU2</i>   | This study |
| SKY 615.4-2     | <i>cdc28-as/cdc28-as SAE2-HA3::URA3/SAE2</i>                                       | This study |
| YLL 1772.5/3C   | <i>sae2Δ::NATMX4::SAE2::LEU2/sae2Δ::NATMX4::SAE2::LEU2</i>                         | This study |
| YLL 2438.91/2A  | <i>sae2Δ::NATMX4::sae2-S267A::LEU2/sae2Δ::NATMX4::sae2-S267A::LEU2</i>             | This study |
| YLL 2340/5D     | <i>sae2Δ::NATMX4::sae2-S267D::LEU2/sae2Δ::NATMX4::sae2-S267D::LEU2</i>             | This study |
| YLL 2679.27/9C  | <i>sae2Δ::NATMX4/sae2Δ::NATMX4</i>                                                 | This study |
| YLL 2547.6/2A   | <i>sae2Δ::NATMX4::sae2-S134A::LEU2/sae2Δ::NATMX4::sae2-S134A::LEU2</i>             | This study |
| YLL 2659.15/9C  | <i>sae2Δ::NATMX4::sae2-S134D::LEU2/sae2Δ::NATMX4::sae2-S134D::LEU2</i>             | This study |
| YLL 2522.71/25A | <i>sae2Δ::NATMX4::sae2-S267A S134A::LEU2/sae2Δ::NATMX4::sae2-S267A S134A::LEU2</i> | This study |
| YLL 2644.1/2B   | <i>sae2Δ::NATMX4::sae2-S267A S134D::LEU2/sae2Δ::NATMX4::sae2-S267A S134D::LEU2</i> | This study |
| YLL 2519.50/8D  | <i>sae2Δ::NATMX4::sae2-S267A S179A::LEU2/sae2Δ::NATMX4::sae2-S267A S179A::LEU2</i> | This study |

---
